# Supplementary material
Source: PubMed Central journal article supplement (PMC3045733)
Supplement: NIHMS274254-supplement-Fig5S.pdf [file NIHMS274254-supplement-Fig5S.pdf]

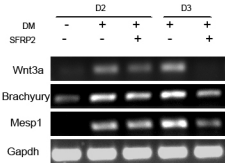

Fig5S. Representative RT PCR (n=3) demonstrating Wnt3a, Brachyury & mesp 1 expression within 72 hours of treatment with DM with/without SFRP2 (3nM). GAPDH serves as loading controls.
